# Supplementary material for: Self-wrinkling induced by the photopolymerization and self-assembly of fluorinated polymer at air/liquid interface
Source: Royal Society of Chemistry journal article supplement (doi:10.1039/c4ta03811h), 2014-09-16
Supplement: c4ta03811h1.pdf [file c4ta03811h1.pdf]

**Self-wrinkling induced by the photopolymerization  
and self-assembly of fluorinated polymer at air/liquid  
interface**

**Yanchang Gan, Xuesong Jiang\*, and Jie Yin**

School of Chemistry & Chemical Engineering, State Key Laboratory for Metal  
Matrix Composite Materials, Shanghai Jiao Tong University

Shanghai 200240, People's Republic of China.

Tel.: +86-21-54743268; Fax: +86-21-54747445. E-mail: [ponygle@sjtu.edu.cn](mailto:ponygle@sjtu.edu.cn)

**1. Experimental section**

**1.1 Materials**

**1.2 Synthesis and characterization of PMMA-F**

**1.3 Synthesis and characterization of PnBA-F**

**1.4 Synthesis and characterization of MMA-PMMA-F**

**2. Results**

**2.1 AFM analysis of cured TMPT resins with 12wt% PMMA**

**2.2 AFM analysis of blank cured TMPT resins**

**2.3 The modulus of the UV-curing films determined by AFM**

**2.4 AFM analysis of TMPT resins with 4wt% PMMA-F under UV for 5s**

**2.5 AFM analysis of cured TMPT resins with 6wt% and 12wt% MMA-PMMA-F**

**2.6 The modulus and volume shrinkage of cured TMPA and A-BPE-10 mixed  
resins.**

## 1. Experimental section

### 1.1 Materials.

Trimethylolpropane triacrylate (TMPTA), 2,2'-(4,4'-(propane-2,2-diyl)bis (4,1-phenylene))bis(oxy)bis(ethane-2,1-diyl) diacrylate (A-BPE-10) and poly(propylene oxide) diacrylate (PPGDA) were provided by Shin-Nakamura Chemical; 2-(perfluorooctyl) Ethyl Acrylate (CFA<sub>8</sub>) were obtained from ALDRICH chemical; Photoinitiator I-907 was obtained from Tronly (Changzhou, China); Other chemicals were obtained from China National Pharmaceutical Group (Shanghai, China). All reagents were used as received except as noted.

**1.2 Synthesis and characterization of PMMA-F.** As shown in Figure S1, a solution of MMA (0.08 mol, 8g), CFA<sub>8</sub> (0.0038 mol, 2g) and 0.1 g AIBN were added in 20 mL of dioxane, the mixed solution were stirring and reacted at 70 °C for 6 h, and then 200 mL methanol was added, the white precipitate were separated and wash by methanol for 6 times and then dried in the vacuum condition at 70 °C for 24 h.

Figure S2 presents the <sup>1</sup>H NMR spectrum of the obtained PMMA-F, and the characteristic signals and their corresponding groups were marked in the spectrum and the inserted structural formula. The molecular weight of The PMMA-F was also determined by GPC. As shown in Figure S3 and Table S1, the Mn and the PDI of the PMMA-F are about  $2.46 \times 10^4$  and 1.67, respectively.

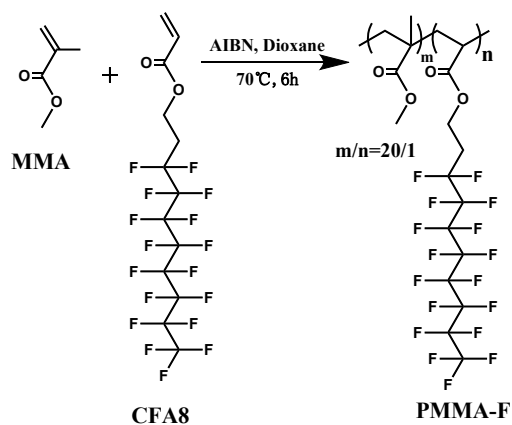

**Figure S1.** The schematic process for synthesis of PMMA-F.

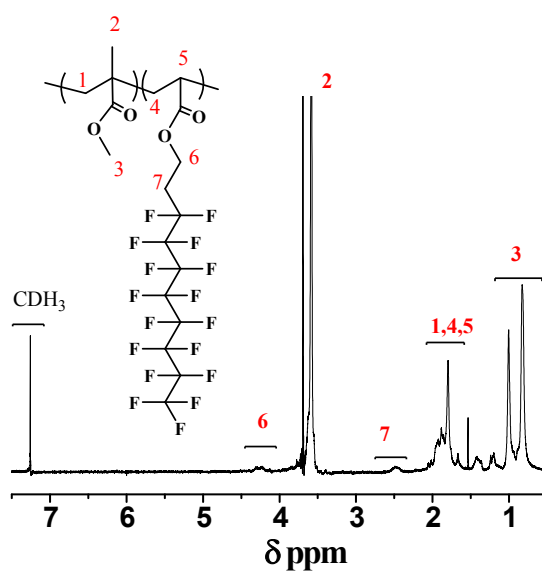

**Figure S2.** The  $^1\text{H}$  NMR spectrum of the PMMA-F in  $\text{CDCl}_3$

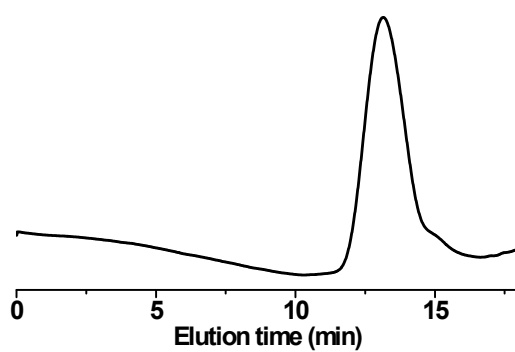

**Figure S3** The GPC curve of PMMA-F, THF as eluent.

### 1.3 Synthesis of PnBA-F.

**PnBA-F** was synthesized according to Figure S4. A solution of nBA (0.08 mol, 10.24g), CFA8 (0.0038 mol, 2g) and 0.12 g AIBN were added in 30 mL of dioxane, the mixed solution were stirring and reacted at 70 °C for 6 h, and then 200 mL methanol/water (4/1) was added, the ropy precipitate were separated and wash by methanol/water for many times and then dried in the vacuum condition at 70 °C for 24 h.

Figure S5 shows the  $^1\text{H}$  NMR spectrum of the prepared PnBA-F, and the characteristic signals and their corresponding groups were marked in the spectrum and the inserted structural formula. As shown in Figure S6 and Table S1, the  $M_n$  and the PDI of the PMMA-F are about  $3.0 \times 10^4$  and 2.18, respectively.

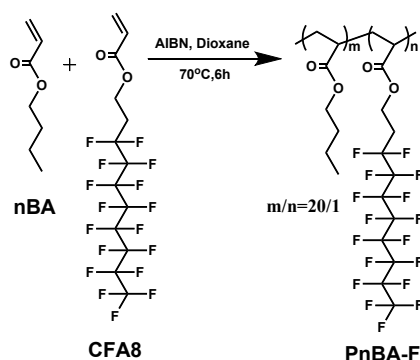

**Figure S4.** The schematic process for synthesis of PnBA-F.

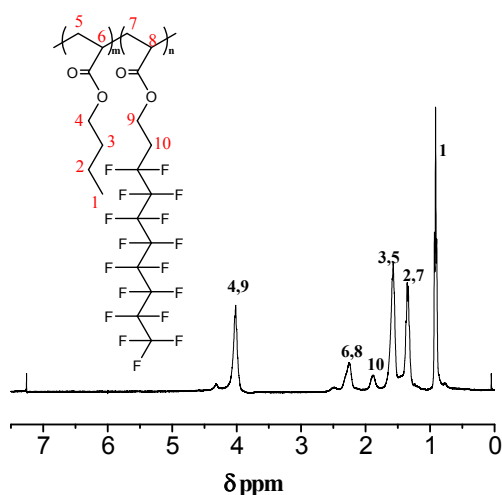

**Figure S5.** The  $^1\text{H}$  NMR spectrum of the PnBA-F in  $\text{CDCl}_3$ .

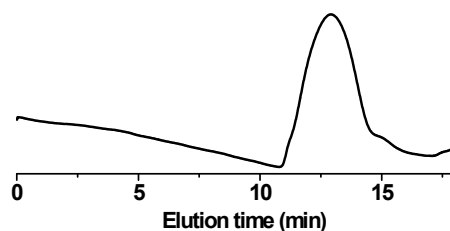

**Figure S6.** The GPC curve of PnBA-F, THF as eluent.

**Table S1** The molecule weight and PDI of fluorinated polymer (PMMA-F and PnBA-F)

| Sample | $M_n/10^4$ | $M_w/10^4$ | $M_w/M_n$ |
|--------|------------|------------|-----------|
| PMMA-F | 2.46       | 4.13       | 1.67      |
| PnBA-F | 3.04       | 6.62       | 2.18      |

#### 1.4 Synthesis of reactive fluorinated polymer (MAA-PMA-F)

As shown in Figure S7, a solution of MMA (0.08 mol, 8g), CFA8 (0.0072 mol, 4g) HEMA (0.04 mol, 5.92g) and 0.1 g AIBN were added in 20 mL of dioxane, the mixed solution were stirring and reacted at 70 °C for 6 h, and then 200 mL methanol was added, the white precipitate were separated and wash by methanol for 6 times and then dried in the vacuum condition at 70 °C for 24 h. Then the 3g of the dried precipitated and 1.5 mL dried triethylamine were dissolved in 50 mL  $\text{CH}_2\text{Cl}_2$  solution and added into 10 mL methacryloyl chloride solution in 1 hour with stirring at 0 °C, the mixed solution were stirring for 24 h and filtered to remove the precipitates. The collected  $\text{CH}_2\text{Cl}_2$  solution was added into cold diethyl ether solution to obtain the white precipitates, the precipitates were dissolved in  $\text{CH}_2\text{Cl}_2$  solution and added in the fresh cold diethyl ether solution again, and the same operation was repeated for 3 times to remove the excess methacryloyl chloride and triethylamine. The obtained white precipitates were dissolved in 40 mL  $\text{CH}_2\text{Cl}_2$  solution and washed by 20 mL deionized water with stirring for 5 times to remove the residual triethylamine hydrochloride, and the  $\text{CH}_2\text{Cl}_2$  phase was collected and dried by anhydrous magnesium sulfate. At last, the objective product of MMA-PMMA-F was obtained by removing the  $\text{CH}_2\text{Cl}_2$  solution using reduced pressure distillation at room temperature.

Figure S8 shows the  $^1\text{H}$  NMR spectrum of the prepared MMA-PMMA-F, and the characteristic signals and their corresponding groups were marked in the spectrum

and the inserted structural formula.

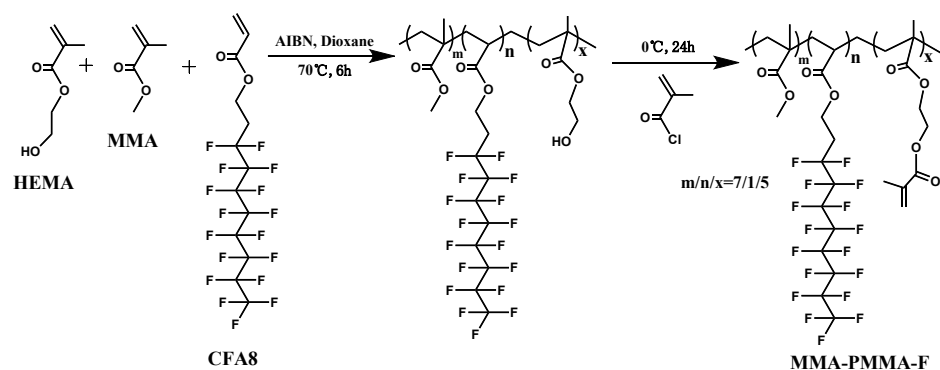

**Figure S7.** The schematic process for synthesis of MMA-PMMA-F.

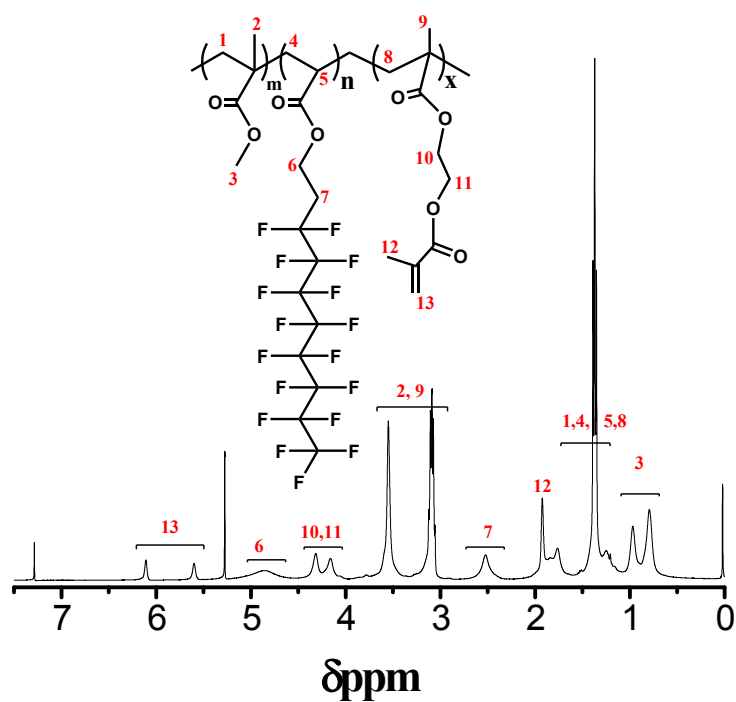

**Figure S8.** The <sup>1</sup>H NMR spectrum of the MMA-PMMA-F in CDCl<sub>3</sub>.

## 2. Results

### 2.1 AFM analysis of cured TMPTA resins with 12wt% PMMA

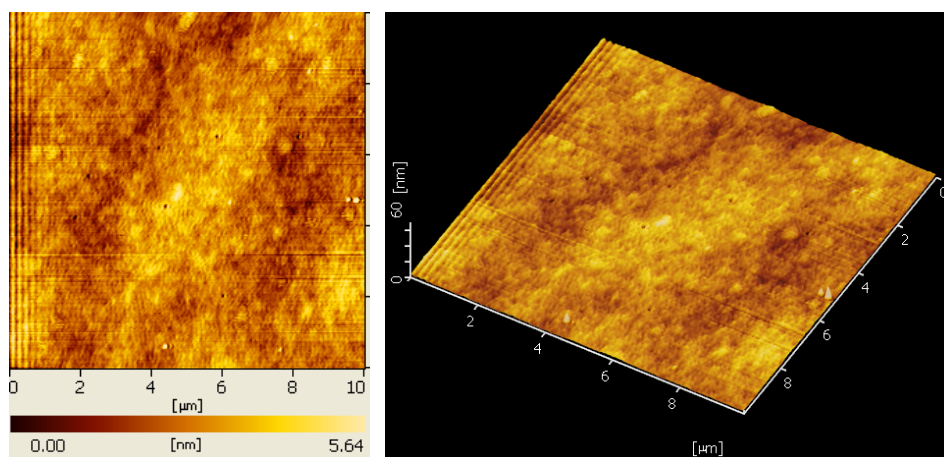

**Figure S9.** AFM images of the cured TMPTA resin with 12wt% pure PMMA.

## 2.2 AFM analysis of cured blank cured TMPTA resins

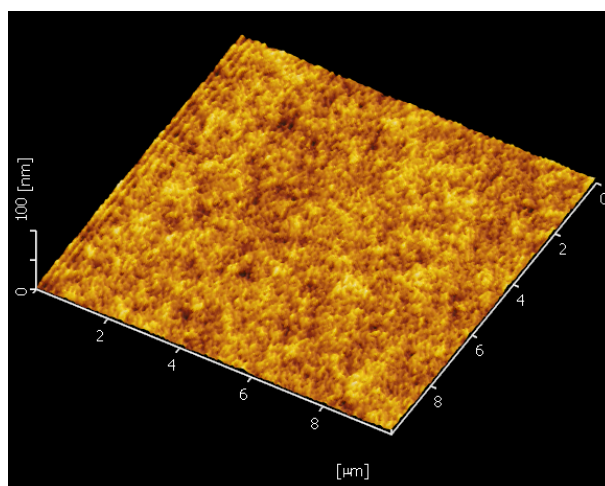

**Figure S10.** 3D AFM image of the blank cured TMPTA resins without additives of polymer.

## 2.3 Measuring the modulus of the UV-curing films by AFM system

The modulus of the cured films were calculated using the AFM force curves based on the Hertz model according to reported literatures.<sup>1-4</sup> The Hertz model gives the relationship of the loading force ( $F$ ), the indentation ( $\delta$ ) and elastic modulus ( $E$ ) of the film as the follows:<sup>1</sup>

$$F = (2/\pi)[E/(1-\nu^2)] \delta^2 \tan(\alpha) \quad (1)$$

Where,  $\nu$  is the Poisson ratio of the film,  $\alpha$  is the half opening angle of the indenting cone.

The  $\delta$  can be given by equation 2 according to the Hooke's law:<sup>1</sup>

$$F = kd = k(z-\delta) \quad (2)$$

Here,  $k$  is the force constant of the cantilever,  $d$  is the deflection of the cantilever. To an infinitely stiff sample, the deflection  $d$  of the cantilever is identical to the movement of the piezo in  $z$  direction:  $d = z$ .

To combine eq 1 and 2 yields:

$$\Delta F = (2/\pi)E/(1-\nu^2)\delta^2 \tan(\alpha) = (2/\pi)E/(1-\nu^2)[\Delta z - (\Delta F/k)]^2 \tan(\alpha) \quad (3)$$

Here the  $\Delta F$  and  $\Delta z$  can be determined independently by taking two different deflection values and their corresponding  $F$  and  $z$  values from a force curve, as shown in Figure S9.

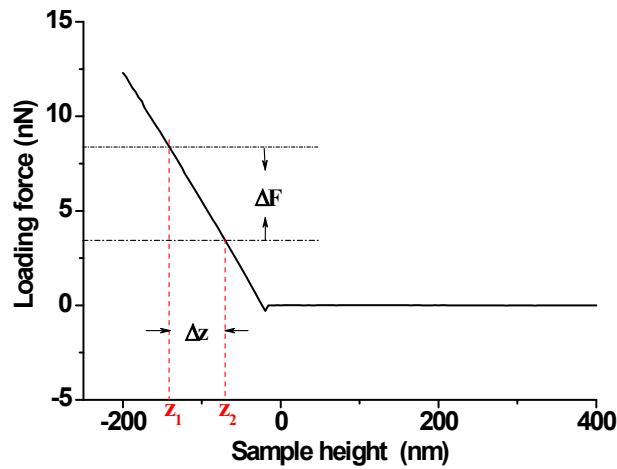

Figure S11. Force curve on the curing TMPTA film.

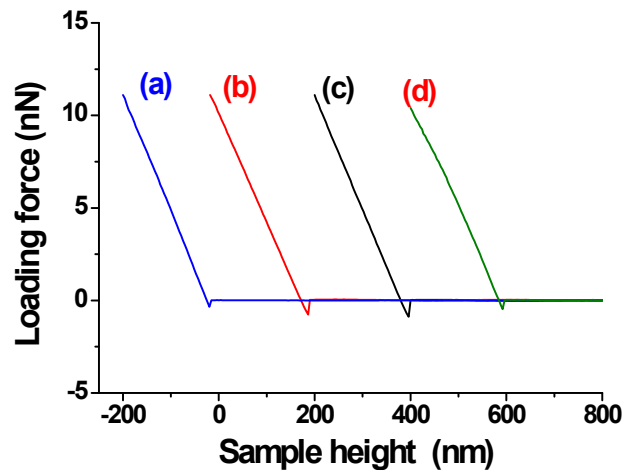

Figure S12. Force curve on the curing TMPTA film with (a) 2% PMMA-F; (b) 6% PMMA-F; (c) 12% PMMA-F and (d) 12% PnBA-F, respectively.

#### 2.4 AFM analysis of TMPT resins with 4wt% PMMA-F under UV for 5s



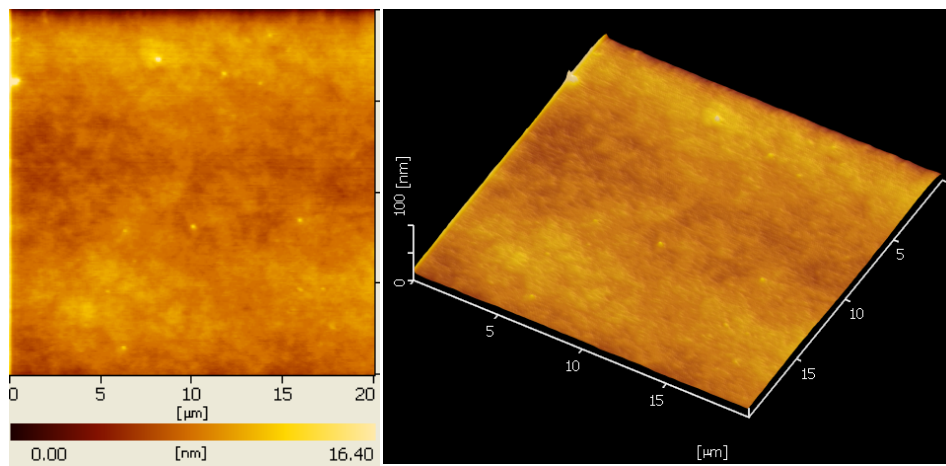

**Figure S13.** AFM images of the TMPT resins with 4wt% PMMA-F under UV for 5s.

### 3.2 AFM analysis of cured TMPT resins with 6wt% and 12wt% MMA-PMMA-F, respectively.

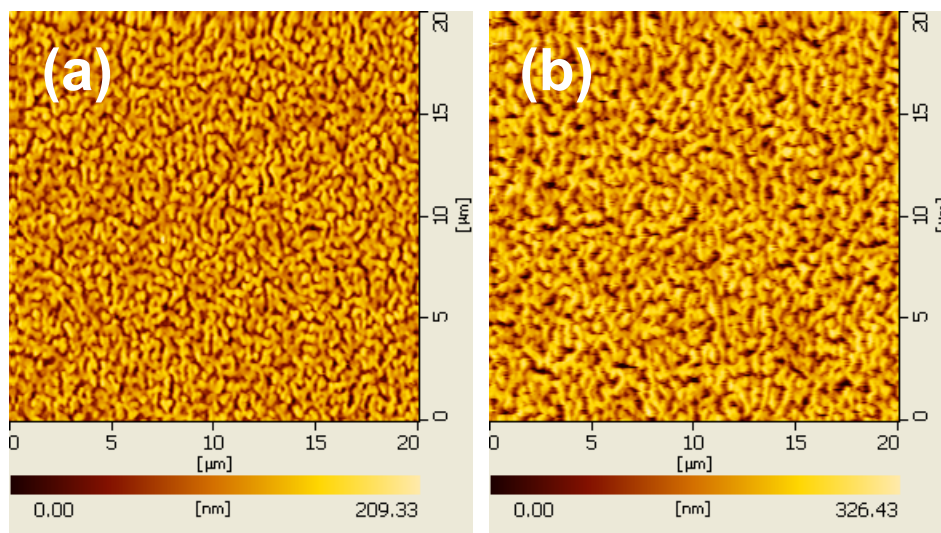

**Figure S14.** AFM images of the cured TMPTA resin with (a) 6wt% MMA-PMMA-F and (b) 12wt% MMA-PMMA-F.

**Table S1** The modulus and volume shrinkage of cured TMPTA and A-BPE-10 mixed resins.

| Curing Samples       | Young modulus (Gpa) <sup>a</sup> | Volume shrinkage (%) <sup>b</sup> |
|----------------------|----------------------------------|-----------------------------------|
| TMPTA/A-BPE-10 (4/1) | 2.3±0.1                          | 14.6                              |
| TMPTA/A-BPE-10 (3/2) | 1.7±0.2                          | 11.3                              |
| TMPTA/A-BPE-10 (2/3) | 1.1±0.15                         | 8.2                               |
| A-BPE-10             | 0.04±0.013                       | 6.5                               |

<sup>a</sup> The Young modulus is calculated by AFM force curves.

<sup>b</sup> The volumetric shrinkage was calculated using the formula:

$$\Delta V\% = \left(1 - \frac{\rho_{uncured}}{\rho_{cured}}\right) \times 100\%.$$

## References

- [1] J. Domke, M. Radmacher, *Langmuir* **1998**, 14, 3320.
- [2] P. J. Nowatzki, C. Franck, S. A. Maskarinec, G. Ravichandran, D. A. Tirrell, *Macromolecules* **2008**, 41, 1839.
- [3] M. Guvendiren, S. Yang, J. A. Burdick, *Adv. Funct. Mater.* **2009**, 19, 3038.
- [4] H. Liu, N. Chen, S. Fujinami, D. Louzguine-Luzgin, K. Nakajima, T. Nishi, *Macromolecules* **2012**, 45, 8770.
